# Supplementary material for: Evidence for in situ graft copolymer formation and compatibilization of PC and PMMA during reactive extrusion processing in the presence of the novel organometallic transesterification catalyst tin(ii) 2-ethylhexanoate
Source: Royal Society of Chemistry journal article supplement (doi:10.1039/c2ra20965a), 2012-01-01
Supplement: c2ra20965a.pdf [file c2ra20965a.pdf]

*Supporting Information*

**Evidence for *in-situ* Graft Copolymer Formation and Compatibilization of PC and PMMA during Reactive Extrusion Processing in the Presence of a Novel Organometallic Transesterification Catalyst Tin (II) 2-ethylhexanoate**

A K Singh, Rajiv Prakash and Dhananjai Pandey\*

School of Materials Science & Technology  
Indian Institute of Technology (Banaras Hindu University)  
Varanasi-221005, India

**Keywords:** Compatibilized blends, Organometallic Transesterification Catalysts, Graft copolymer, Polycarbonate, Poly(methyl methacrylate)

---

\*Author to whom correspondence should be addressed; electronic mail:  
[dpandey\\_bhu@yahoo.co.in](mailto:dpandey_bhu@yahoo.co.in); [dp.mst1979@gmail.com](mailto:dp.mst1979@gmail.com)

### Supplementary Information 1:

#### *Structure of Tin (II) 2-ethylhexanoate*

The structure of tin (II) 2-ethylhexanoate or  $\text{Sn}(\text{Oct})_2$  or  $[\text{CH}_3(\text{CH}_2)_3\text{CH}(\text{C}_2\text{H}_5)\text{CO}_2]_2\text{Sn}$  is as follows:

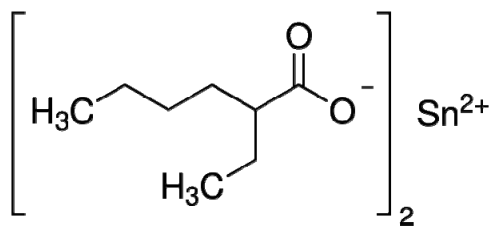

#### *Melt flow index and density of PC and PMMA*

##### PC

Melt flow rate=38gm/10min, at 300°C/1.2 kg load.

Density=1.2 gm/cm<sup>3</sup>

##### PMMA

Melt Flow Index=5gm/10min, at 230°C/3.8 kg load

Density=1.18 gm/cm<sup>3</sup>

**Supplementary Information 2:**

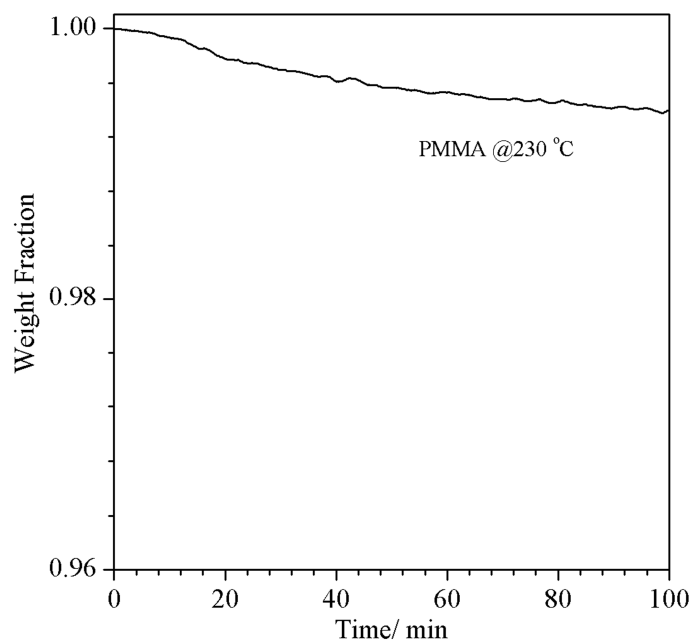

**Figure S1.** TGA thermogram of PMMA obtained by isothermal heating at 230°C.
